# Supplementary material for: Simulating Serial-Target Antibacterial Drug Synergies Using Flux Balance Analysis
Source: PLOS journal article supplement (doi:10.1371/journal.pone.0147651), 2016-01-28
Supplement: S6 (10.1371/journal.pone.0147651.s006) [file journal.pone.0147651.s006]

S2 Fig

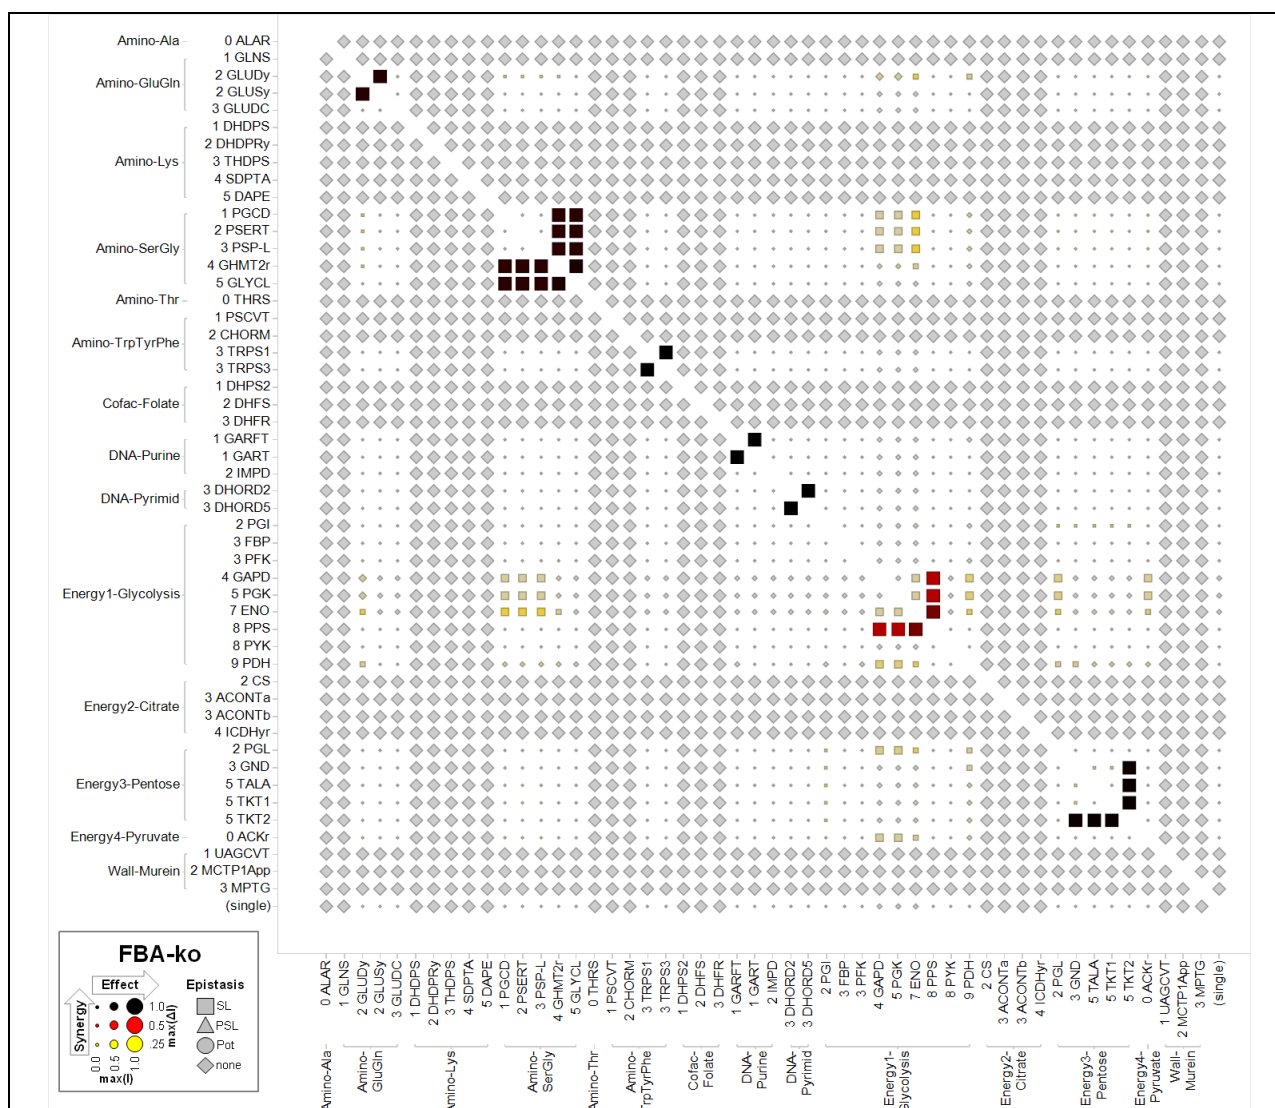**S2 Fig. Mechanistic patterns in FBA-ko simulated inhibitor combinations.**

Each symbol represents the simulated FBA-ko response to inhibiting a single or pair of targets (see Figure 2), with enzymes organized by pathway and metabolic reaction order in the iAF1260 model. Symbol shape shows the type of interaction (synthetic lethal “SL”, partial synthetic lethal “PSL”, potentiation “Pot”, or non-interaction “None”), size shows the effect  $\max(I)$ , and color shows the synergy  $\max(\Delta I)$  between two targets. The only strong interactions found are SL between “interchangeable” enzymes along alternative paths to a common endpoint, and there are no synergies between two singly essential enzymes.
