# Supplementary material for: Simulating Serial-Target Antibacterial Drug Synergies Using Flux Balance Analysis
Source: PLOS journal article supplement (doi:10.1371/journal.pone.0147651), 2016-01-28
Supplement: S9 (10.1371/journal.pone.0147651.s009) [file journal.pone.0147651.s009]

S5 Fig

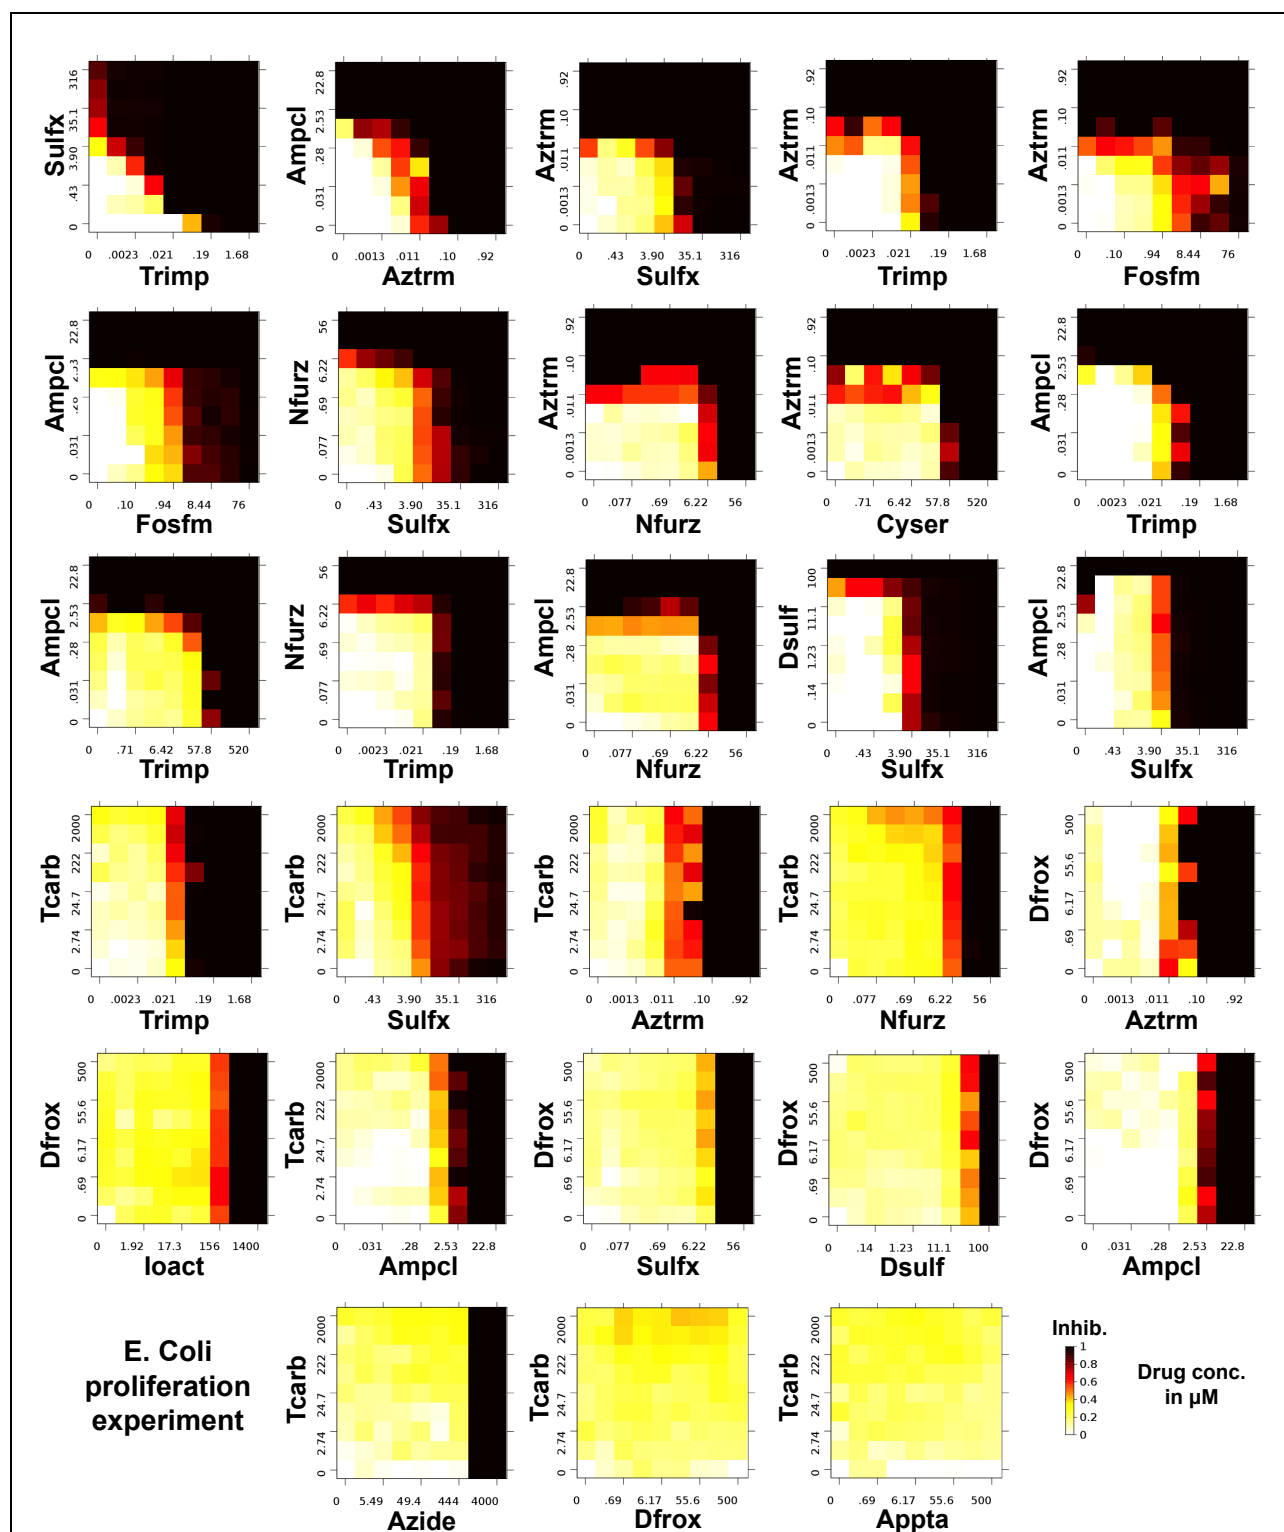**S5 Fig. Experimental dose response matrices.**

Experimentally measured drug-drug dose response matrices, ordered by total activity. The effects range from potentiation-like synergies (eg, Sulfx+Trimp), through non-interacting pairs (eg, Nfurz+Trimp), to antagonisms (eg, Ampcl+Sulfx). There were also inactive single agents such as Dfrox and Tcarb for which interactions could not be accurately determined. Synergy scores were calculated and compared to the simulated dose-response matrices.
